# Supplementary material
Source: Springer Nature journal article supplement (https://www.springermedizin.de/resource/supplementary/12913_2012_2488_MOESM1_ESM.pdf/9532112)

# Within/outside intended Therapeutic Range (TR)

No of patients

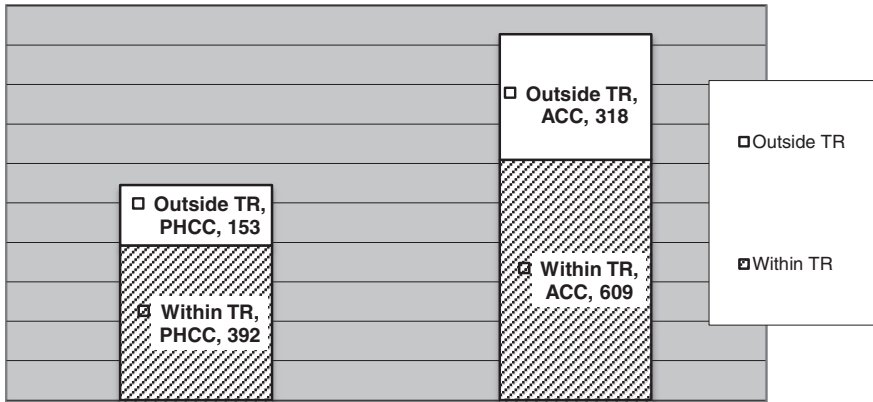

Supplement: MOESM1 [file 9532112]
